# Supplementary material
Source: PubMed Central journal article supplement (PMC8111123)
Supplement: JCM.02321-20-s0001.pdf [file JCM.02321-20-s0001.pdf]

1 **Supplementary Materials**

2 **Dynamics of HEV Antibodies and Development of a Multi-factorial Model to**  
3 **Improve the Diagnosis of Current HEV Infection in Resource-limited Settings**

4

5 **Validation of the laboratory-developed test (LDT) of HEV RNA detection**

6 The in-house developed HEV RNA RT-PCR assay was validated against the  
7 commercial Promotor® HEV RNA detection kit (ACON, Hangzhou, China), which  
8 was approved by the National Medical Products Administration (NMPA) of China to  
9 provide a qualitative dichotomous positive/negative diagnostic result. For each  
10 method, the reproducibility was assessed by calculating the coefficient of variation  
11 (CV) of the threshold cycle ( $C_t$ ) obtained for each standard dilution tested in 5  
12 replicates. The CV was found to be inferior to 2% (Table S1). The LDT yielded good  
13 dilution linearity at HEV RNA levels within 3.73–7.73  $\log_{10}$ copies/mL. The standard  
14 curve of the LDT gave a slope of -3.2534, with Y-intercept of 48.083 and a  $R^2$  value  
15 of 0.9979.

16 The limit of detection (LOD) was determined using serial 3-fold dilutions of  
17 HEV RNA standard in nuclease-free water to give 4.73, 4.25, 3.77, 3.30, 2.82 and  
18 2.34  $\log_{10}$ copies/mL (5 replicates tested by the LDT and 3 replicates tested by the  
19 Promoter® assay of each concentration). Probit analysis predicted the 95% LOD of  
20 1849 (95% CI: 258-13234) copies/mL for the Promoter® assay and 2295 (95% CI:  
21 1.6-3265472) copies/mL for the LDT (Table S2).

22 HEV RNA presence was tested in 28 clinical samples in parallel by each assay  
23 and 100% qualitative agreement (negative or positive) was reached across specimens.  
24 The viral loads in 22 HEV RNA-positive samples measured by each assay are shown  
25 in Fig. S1. The results by the Promoter® assay and the LDT were linearly associated

26 and correlated ( $R^2=0.8611$ ,  $p < 0.0001$ ) (Fig. S1A). Bland-Altman analysis indicated  
27 that the LDT gave a slightly higher viral load than did the Promoter® assay. The mean  
28 [Promoter®-LDT] difference was  $-0.76 \log_{10}$ copies/mL (Fig. S1B). Notably, the  
29 other 6 samples with positive anti-HEV IgM but negative HEV RNA determined by  
30 the LDT were confirmed negative by the Promoter® assay.

31

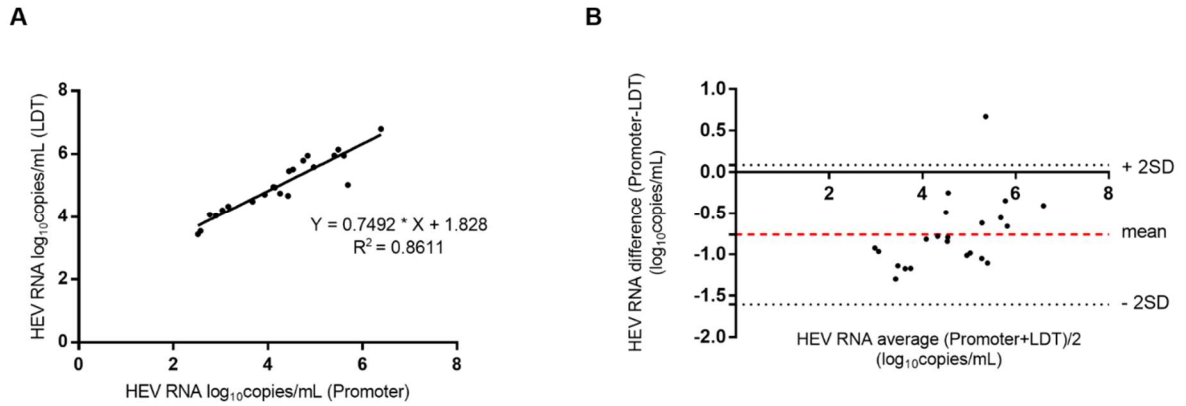

32

33 **Fig S1** Agreement between HEV RNA concentrations measured by the LDT and the

34 Promoter® assay. (A) Linear regression analysis of HEV RNA concentrations

35 determined by the LDT and the Promoter® assay. (B) Bland-Altman plot for bias

36 analysis between the LDT and the Promoter® assay. The red dashed line represents

37 the mean of the difference ( $n = -0.76 \log_{10}$ copies/mL) and black dotted lines show

38 the mean  $\pm 2$  standard deviation.

39

40 **Table S1** Detection results of 10-fold dilutions of HEV RNA standard

| HEV RNA concentration |                               | Promoter®       |                |      |      | LDT             |                |      |      |
|-----------------------|-------------------------------|-----------------|----------------|------|------|-----------------|----------------|------|------|
| copies/mL             | log <sub>10</sub> (copies/mL) | Detected/Tested | Mean <i>Ct</i> | SD   | CV%  | Detected/Tested | Mean <i>Ct</i> | SD   | CV%  |
| 5.35E+07              | 7.73                          | 5/5             | 18.95          | 0.24 | 1.27 | 5/5             | 22.80          | 0.13 | 0.57 |
| 5.35E+06              | 6.73                          | 5/5             | 22.40          | 0.19 | 0.85 | 5/5             | 26.20          | 0.22 | 0.84 |
| 5.35E+05              | 5.73                          | 5/5             | 25.75          | 0.14 | 0.54 | 5/5             | 29.55          | 0.25 | 0.85 |
| 5.35E+04              | 4.73                          | 5/5             | 29.02          | 0.39 | 1.34 | 5/5             | 33.02          | 0.20 | 0.60 |
| 5.35E+03              | 3.73                          | 5/5             | 32.51          | 0.50 | 1.54 | 5/5             | 35.66          | 0.54 | 1.51 |
| 5.35E+02              | 2.73                          | 3/5             | 35.49          | 0.71 | 2.00 | 0/5             | /              | /    | /    |

41 LDT: laboratory-developed test; *Ct*: cycle threshold; SD: standard deviation; CV: coefficient of variation

42

43

44

45 **Table S2** Detection limit of the RT-PCR assays

| HEV RNA concentration |                             | Promoter®       |          | LDT             |          |
|-----------------------|-----------------------------|-----------------|----------|-----------------|----------|
| copies/mL             | log <sub>10</sub> copies/mL | Detected/Tested | %        | Detected/Tested | %        |
|                       |                             |                 | Detected |                 | Detected |
| 5.35E+04              | 4.73                        | 3/3             | 100.0    | 5/5             | 100.0    |
| 1.78E+04              | 4.25                        | 3/3             | 100.0    | 5/5             | 100.0    |
| 5.94E+03              | 3.77                        | 3/3             | 100.0    | 5/5             | 100.0    |
| 1.98E+03              | 3.30                        | 3/3             | 100.0    | 4/5             | 80.0     |
| 6.60E+02              | 2.82                        | 2/3             | 67.7     | 0/5             | 0.0      |
| 2.20E+02              | 2.34                        | 1/3             | 33.3     | 0/5             | 0.0      |
| 7.34E+01              | 1.87                        | 0/3             | 0.0      | 0/5             | 0.0      |

46 Probit value (95% detection rate) for the Promoter® assay = 1849 copies/mL (95% CI: 258.4-  
 47 13234).

48 Probit value (95% detection rate) for the LDT assay = 2295 copies/mL (95% CI: 1.612-  
 49 3265472).

50

51

52 **Table S3** HEV Ag and HEV RNA levels in sample A and sample B diluted with either  
 53 positive or negative anti-HEV IgG serum

|                                        | IgG<br>(COI) | IgM<br>(COI) | HEV Ag<br>(S/CO) | HEV RNA<br>(log <sub>10</sub> copies/mL) |
|----------------------------------------|--------------|--------------|------------------|------------------------------------------|
| IgG positive pooled sera               | 16.7         | 0.32         | 0.08             | (-)                                      |
| IgG negative pooled sera               | 0.02         | 0.05         | 0.08             | (-)                                      |
| <b>Sample #A</b>                       | 7.81         | 42.29        | 37.11            | 7.44                                     |
| #A_1/10 diluted by IgG_positive sera   | /            | /            | 0.07             | 6.20                                     |
| #A_1/100 diluted by IgG_positive sera  | /            | /            | 0.09             | 5.23                                     |
| #A_1/1000 diluted by IgG_positive sera | /            | /            | 0.06             | 4.29                                     |
| #A_1/10 diluted by IgG_negative sera   | /            | /            | 23.79            | 6.35                                     |
| #A_1/100 diluted by IgG_negative sera  | /            | /            | 4.21             | 5.43                                     |
| #A_1/1000 diluted by IgG_negative sera | /            | /            | 0.41             | 3.96                                     |
| <b>Sample #B</b>                       | 4.47         | 12.06        | 34.81            | 7.91                                     |
| #B_1/10 diluted by IgG_positive sera   | /            | /            | 0.06             | 7.32                                     |
| #B_1/100 diluted by IgG_positive sera  | /            | /            | 0.08             | 6.50                                     |
| #B_1/1000 diluted by IgG_positive sera | /            | /            | 0.08             | 5.42                                     |
| #B_1/10 diluted by IgG_negative sera   | /            | /            | 16               | 7.39                                     |
| #B_1/100 diluted by IgG_negative sera  | /            | /            | 1.81             | 6.36                                     |
| #B_1/1000 diluted by IgG_negative sera | /            | /            | 0.15             | 5.28                                     |

54

55 **Table S4** Multivariate stepwise logistic regression analysis of factors associated with HEV

56 RNA presence

| Variables               | Current HEV infection  |                    |                |                        |                          |                |
|-------------------------|------------------------|--------------------|----------------|------------------------|--------------------------|----------------|
|                         | univariate analysis    |                    |                | multivariate analysis  |                          |                |
|                         | $\beta$<br>coefficient | OR (95% CI)        | <i>p</i> value | $\beta$<br>coefficient | OR (95% CI)              | <i>p</i> value |
| Age                     | 0.017                  | 1.02 (1.00–1.04)   | 0.098          | –                      | –                        | –              |
| Gender                  | 0.276                  | 1.32 (0.76–2.29)   | 0.328          | –                      | –                        | –              |
| Log <sub>10</sub> (Ag)  | 3.04                   | 20.88 (8.62-50.57) | < 0.001        | 3.08                   | 25.52 (4.75-136.97)      | < 0.001        |
| Log <sub>10</sub> (IgG) | -0.97                  | 0.38 (0.11-1.34)   | 0.132          | –                      | –                        | –              |
| Log <sub>10</sub> (IgM) | 2.94                   | 18.86 (8.47-41.96) | < 0.001        | 5.14                   | 175.57 (19.78- > 999.99) | < 0.001        |
| $\sqrt{ALT/ULN}$        | 1.61                   | 5.00 (2.98-8.40)   | < 0.001        | 2.64                   | 12.28(2.09-72.01)        | < 0.001        |

57 OR: odds ratio; CI: confidence interval; Ag: antigen; ALT: alanine aminotransferase; ULN:

58 upper limit of normal

59

60
